# Supplementary material for: Dual Molecular Diagnoses of Recessive Disorders in a Child from Consanguineous Parents: Case Report and Literature Review
Source: MDPI journal article supplement (doi:10.3390/genes13122377), 2022-12-16
Supplement: s1 [file s1]

**Supplementary Table S1.** Multiple Pathogenic Variants in Patients with Autosomal Recessive Conditions

| Dual Molecular Diagnoses (AR + AR) | Submitter                      | Consanguinity |
|------------------------------------|--------------------------------|---------------|
| <i>AGL + PCCA</i>                  | Posey et al, 2017 [1]          | +             |
| <i>HEXB + MCCC2</i>                | Posey et al, 2017 [1]          | +             |
| <i>MTPAP + NPC1</i>                | Posey et al, 2017 [1]          | +             |
| <i>RECQL4 + XPC</i>                | Posey et al, 2017 [1]          | +             |
| <i>TPO + MMP2</i>                  | Posey et al, 2017 [1]          | +             |
| <i>AGL + LPAR6</i>                 | Posey et al, 2017 [1]          | +             |
| <i>PAPSS2 + TRDN</i>               | Posey et al, 2017 [1]          | +             |
| <i>OTOF + SLC12A6</i>              | Posey et al, 2017 [1]          | +             |
| <i>AGPAT2 + OBSL1</i>              | Posey et al, 2017 [1]          | +             |
| <i>MCCC1 + GNB5</i>                | Shao et al, 2021 [25]          | +             |
| <i>UGT1A1 + ABCC2</i>              | L Slachtova et al, 2016 [26]   | +             |
| <i>UGT1A1 + ABCC2</i>              | L Slachtova et al, 2016 [26]   | +             |
| <i>UGT1A1 + ABCC2</i>              | L Slachtova et al, 2016 [26]   | -             |
| <i>UGT1A1 + ABCC2</i>              | L Slachtova et al, 2016 [26]   | -             |
| <i>PKHD1 + ATM</i>                 | Balci et al, 2017 [3]          | -             |
| <i>G6PC3 + SLC45A2</i>             | Balci et al, 2017 [3]          | +             |
| <i>CYP26C1 + MED25</i>             | Balci et al, 2017 [3]          | +             |
| <i>ERCC6 + BCKDHA</i>              | Balci et al, 2017 [3]          | +             |
| <i>MAPRE2 + CDON</i>               | Berkun et al, 2019             | +             |
| <i>HPSE2 + SMPD1</i>               | Cesur Baltacı et al, 2021 [28] | +             |
| <i>UGT1A1 + ABCC2</i>              | Cebecauerova et al, 2005 [29]  | -             |
| <i>ATP7B + GALT</i>                | Doğulu et al, 2022 [30]        | +             |
| <i>AMPD2 + AP4B1</i>               | Karaca et al, 2018 [10]        | +             |
| <i>C12ORF65 + GPR126</i>           | Karaca et al, 2018 [10]        | +             |
| <i>ITGA7 + MAGI3</i>               | Karaca et al, 2018 [10]        | +             |
| <i>CUL7 + ILDR1</i>                | Akalin et al, 2022 [31]        | +             |
| <i>NBEAL2 + DNAH5</i>              | Al-Dewik et al, 2019 [32]      | -             |
| <i>GLE1 + ATM</i>                  | Al-Dewik et al, 2019 [32]      | -             |
| <i>LAMA2 + TMPRSS4</i>             | Al-Dewik et al, 2019 [32]      | +             |
| <i>NEB + GALC</i>                  | Al-Dewik et al, 2019 [32]      | -             |
| <i>RPIA + LAMTOR4</i>              | Al-Dewik et al, 2019 [32]      | -             |
| <i>KDM2B + RSPO4</i>               | Mitani et al, 2021 [12]        | +             |
| <i>HECTD4 + TRAK1</i>              | Mitani et al, 2021 [12]        | +             |
| <i>GOLGA2 + MRPS27</i>             | Mitani et al, 2021 [12]        | +             |
| <i>CEP290 + SLC37A1</i>            | Mitani et al, 2021 [12]        | +             |
| <i>SORCS2 + ACOT7</i>              | Mitani et al, 2021 [12]        | +             |
| <i>DLGAP1 + OCLN</i>               | Mitani et al, 2021 [12]        | +             |
| <i>TUBB6 + WDR81</i>               | Mitani et al, 2021 [12]        | +             |
| <i>AMPD2 + MKS1</i>                | Mitani et al, 2021 [12]        | +             |

|                         |                           |    |
|-------------------------|---------------------------|----|
| <i>DUSP4 + SLC39A10</i> | Mitani et al, 2021 [12]   | +  |
| <i>SSTR3 + TMOD1</i>    | Mitani et al, 2021 [12]   | +  |
| <i>ADSL + TNRC6B</i>    | Mitani et al, 2021 [12]   | +  |
| <i>LPAR6 + PLK4</i>     | Mitani et al, 2021 [12]   | +  |
| <i>SSH3 + TRMT1</i>     | Mitani et al, 2021 [12]   | +  |
| <i>LCTL + PLAA</i>      | Mitani et al, 2021 [12]   | +  |
| <i>ASNS + RASGRF2</i>   | Mitani et al, 2021 [12]   | +  |
| <i>FAM120A + STUB1</i>  | Mitani et al, 2021 [12]   | +  |
| <i>COBL + DDC</i>       | Mitani et al, 2021 [12]   | +  |
| <i>LRP2 + PCDH18</i>    | Mitani et al, 2021 [12]   | +  |
| <i>GIT1 + WDR83OS</i>   | Mitani et al, 2021 [12]   | +  |
| <i>ARV1+ ASH1L</i>      | Mitani et al, 2021 [12]   | +  |
| <i>CNTNAP2 + STOML1</i> | Mitani et al, 2021 [12]   | +  |
| <i>CLP1 + CNTN5</i>     | Mitani et al, 2021 [12]   | +  |
| <i>SCN7A + SPR</i>      | Mitani et al, 2021 [12]   | +  |
| <i>FSHR + LAMA1</i>     | Mitani et al, 2021 [12]   | +  |
| <i>NANS + NRD1</i>      | Mitani et al, 2021 [12]   | +  |
| <i>PLD3 + RNASEH2A</i>  | Mitani et al, 2021 [12]   | +  |
| <i>CIT + ULK2</i>       | Mitani et al, 2021 [12]   | -  |
| <i>C2ORF69 + PARD3B</i> | Mitani et al, 2021 [12]   | -  |
| <i>G6PC + GAA</i>       | Monies et al, 2019 [33]   | +  |
| <i>CRB1 + ADIPOR1</i>   | Monies et al, 2019 [33]   | +  |
| <i>ECEL1 + FLII</i>     | Pehlivan et al, 2019 [11] | +  |
| <i>NEB + MID1IP1</i>    | Pehlivan et al, 2019 [11] | +  |
| <i>COG6 + MED27</i>     | Pehlivan et al, 2019 [11] | +  |
| <i>TNNT1 + PRODH</i>    | Smith et al, 2019 [4]     | NA |
| <i>ACAT1 + ETFB</i>     | Smith et al, 2019 [4]     | NA |
| <i>DNAH5 + TMEM67</i>   | Smith et al, 2019 [4]     | NA |
| <i>CUL7 + ACAN</i>      | Smith et al, 2019 [4]     | NA |
| <i>DOK7 + SACS</i>      | Smith et al, 2019 [4]     | NA |
| <i>TCTN2 + UNC45B</i>   | Smith et al, 2019 [4]     | NA |
| <i>AUH + SGSH</i>       | Smith et al, 2019 [4]     | NA |
| <i>RNASEH2A + PNPK</i>  | Smith et al, 2019 [4]     | NA |
| <i>CSTB + CEP152</i>    | Smith et al, 2019 [4]     | NA |
| <i>WDR81 + SYNJ1</i>    | Smith et al, 2019 [4]     | NA |
| <i>LONP1 + ATP7B</i>    | Smith et al, 2019 [4]     | NA |
| <i>CEP57 + DYNC2H1</i>  | Pezzani et al, 2020 [34]  | +  |
| <i>SLC26A2 + IFT27</i>  | Rosina et al, 2022 [35]   | -  |
| <i>DNAI1 + TJP2</i>     | Rosina et al, 2022 [35]   | +  |
| <i>DNAI1 + TJP2</i>     | Rosina et al, 2022 [35]   | -  |
| <i>DCLRE1C + ATM</i>    | Rosina et al, 2022 [35]   | +  |
| <i>EVC2 + TMC1</i>      | Umair et al, 2017 [37]    | +  |

| Multiple Molecular Diagnoses (AR + AR + _ ) | Submitter                   | Consanguinidade |
|---------------------------------------------|-----------------------------|-----------------|
| <i>PXDN + NIPAL4 + OCTN2</i>                | Balci et al, 2017 [3]       | +               |
| <i>CAPN3 + MUSK + NAV2 + ZC4H2</i>          | Herman et al, 2021 [2]      | +               |
| <i>ACBD6 + ACCN2 + FRMD7</i>                | Mitani et al, 2021 [12]     | +               |
| <i>PNKP + RTN2 + VRK3</i>                   | Mitani et al, 2021 [12]     | +               |
| <i>MRPS25 + PPP1R15A + PTCHD2</i>           | Mitani et al, 2021 [12]     | +               |
| <i>JRK + KDM5A + VPS28</i>                  | Mitani et al, 2021 [12]     | +               |
| <i>SLC7A1 + VSTM2L + WARS2</i>              | Mitani et al, 2021 [12]     | +               |
| <i>EXOSC3 + MYH1 + SMARCA1</i>              | Mitani et al, 2021 [12]     | +               |
| <i>LPAR6 + PARD3B + PDZD2</i>               | Mitani et al, 2021 [12]     | +               |
| <i>RANBP3L + RNASEH2A + TTLL11</i>          | Mitani et al, 2021 [12]     | +               |
| <i>RANBP3L + APTX + TTLL11</i>              | Mitani et al, 2021 [12]     | +               |
| <i>CLP1 + GIN1 + SLC25A45</i>               | Mitani et al, 2021 [12]     | +               |
| <i>CNTNAP2 + STOML1 + STON2</i>             | Mitani et al, 2021 [12]     | +               |
| <i>FBN1 + PLOD2 + TF</i>                    | Farajzadeh et al, 2020 [36] | +               |
| <i>GBE1 + AP4M1 + TAF9B</i>                 | Pehlivan et al, 2019 [11]   | -               |
| <i>COL6A3 + ABCA7 + ADNP</i>                | Pehlivan et al, 2019 [11]   | +               |
| <i>KLHL7 + HOXA11 + TNRC6C</i>              | Pehlivan et al, 2019 [11]   | +               |
| <i>DRG1 + TANC1 + BRWD3</i>                 | Pehlivan et al, 2019 [11]   | +               |
| <i>BSCL2 + NDUFS3 + HIKESHI</i>             | Smith et al, 2019 [4]       | NA              |
| <i>NSUN2 + HCF1 + VPS13B</i>                | Smith et al, 2019 [4]       | NA              |
| <i>UBE3B + EHMT1 + KIAA1033</i>             | Smith et al, 2019 [4]       | NA              |
| <i>PDE6A + SH3TC2 + SLC26A2</i>             | Smith et al, 2019 [4]       | NA              |

NA = data not available

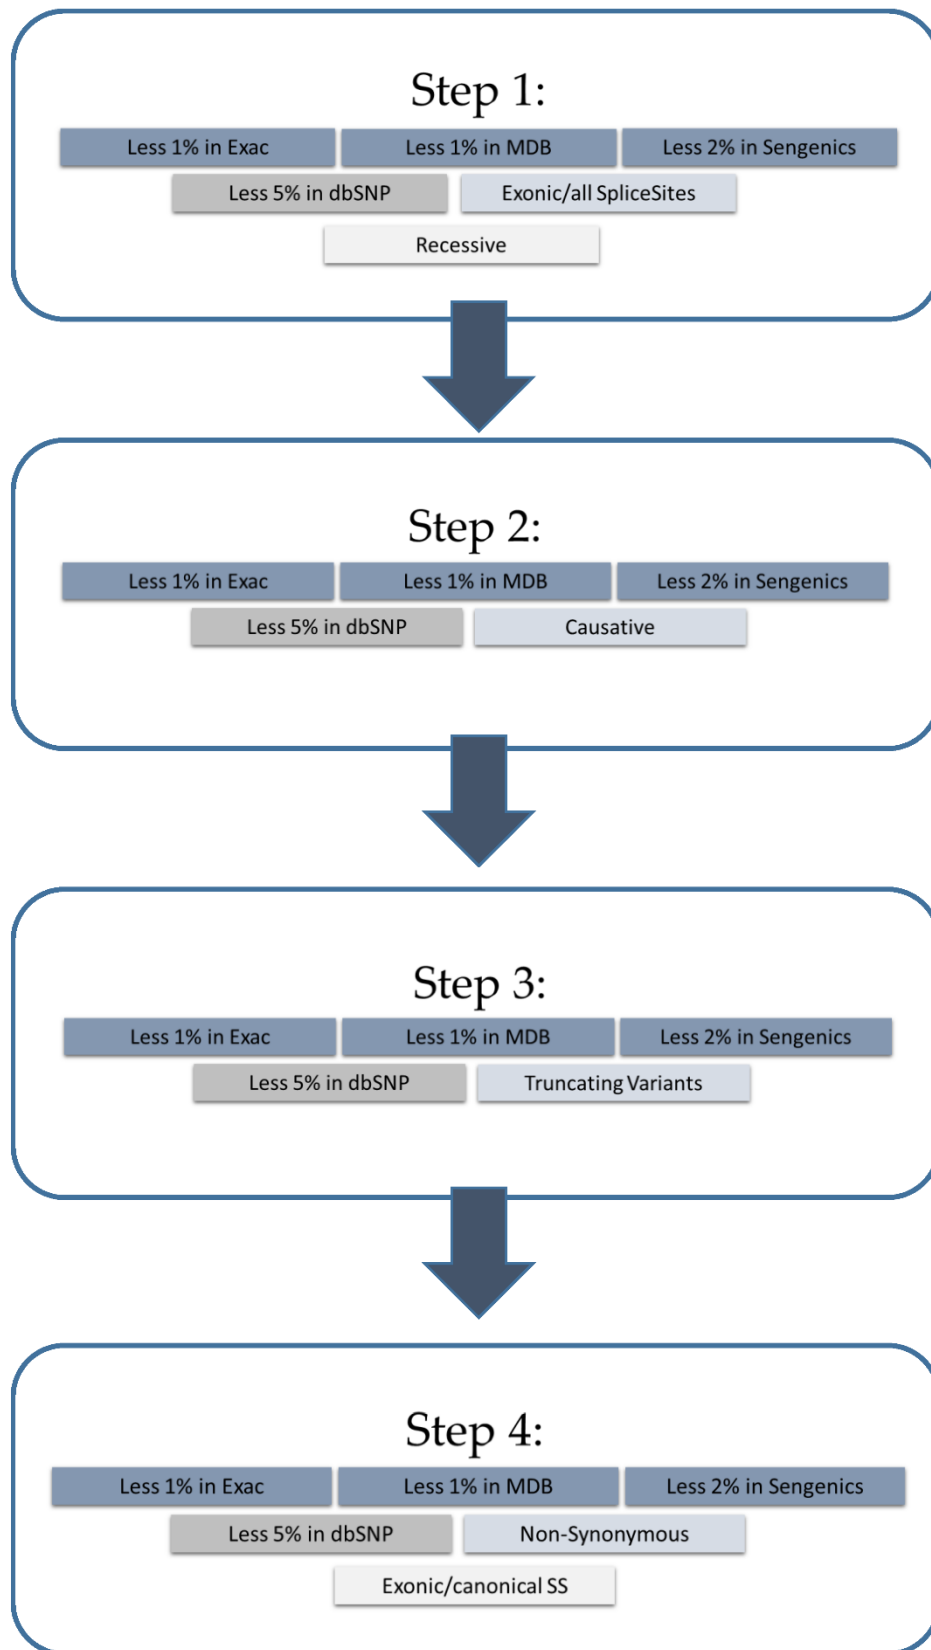

**Figure S1.** Flow sheet of the WES filtration steps.
